# Supplementary material
Source: HighWire-hosted journal article supplement (https://nutrition.bmj.com/content/6/1/91)
Supplement: inline-supplementary-material-1 [file inline-supplementary-material-1.pdf]

## Appendix 1

**Table A1. Availability of data associated with the "5-2-1-0" recommendations for the GSHS surveys carried out in sub-Saharan Africa since 2003**

| Country      | Year      | 5<br>Fruits and vegetables | 2<br>Screen time | 1<br>Physical activity | 0<br>Sugar sweetened<br>beverages |
|--------------|-----------|----------------------------|------------------|------------------------|-----------------------------------|
| Benin        | 2016      | X                          | X                | X                      | X                                 |
| Benin        | 2009-2010 | X                          | X                | X                      | X                                 |
| Botswana     | 2005      | X                          | X                | X                      |                                   |
| Eswatini     | 2003      | X                          |                  |                        |                                   |
| Eswatini     | 2013      | X                          |                  |                        | X                                 |
| Ghana        | 2012      | X                          | X                | X                      | X                                 |
| Ghana        | 2007      | X                          | X                | X                      |                                   |
| Kenya        | 2003      | X                          | X                | X                      |                                   |
| Liberia      | 2017      | X                          | X                | X                      | X                                 |
| Malawi       | 2009      | X                          |                  |                        |                                   |
| Mauritania   | 2010      | X                          | X                | X                      | X                                 |
| Mauritius    | 2017      | X                          | X                | X                      | X                                 |
| Mauritius    | 2011      | X                          | X                | X                      | X                                 |
| Mauritius    | 2007      |                            | X                | X                      |                                   |
| Mozambique   | 2015      | X                          | X                | X                      | X                                 |
| Namibia      | 2013      | X                          | X                | X                      | X                                 |
| Senegal      | 2005      | X                          | X                | X                      |                                   |
| Seychelles   | 2015      | X                          | X                | X                      | X                                 |
| Seychelles   | 2007      | X                          | X                | X                      |                                   |
| Sierra Leone | 2017      |                            | X                | X                      |                                   |

|          |      |   |   |   |   |
|----------|------|---|---|---|---|
| Tanzania | 2014 | X | X | X | X |
| Tanzania | 2006 | X | X | X |   |
| Uganda   | 2003 | X | X | X |   |
| Zambia   | 2004 | X | X | X |   |
| Zimbabwe | 2013 |   | X | X |   |
